# Supplementary material for: Diphlorethohydroxycarmalol Isolated from Ishige okamurae Represses High Glucose-Induced Angiogenesis In Vitro and In Vivo
Source: MDPI journal article supplement (doi:10.3390/md16100375), 2018-10-10
Supplement: s1 [file s1]

Supplementary Materials

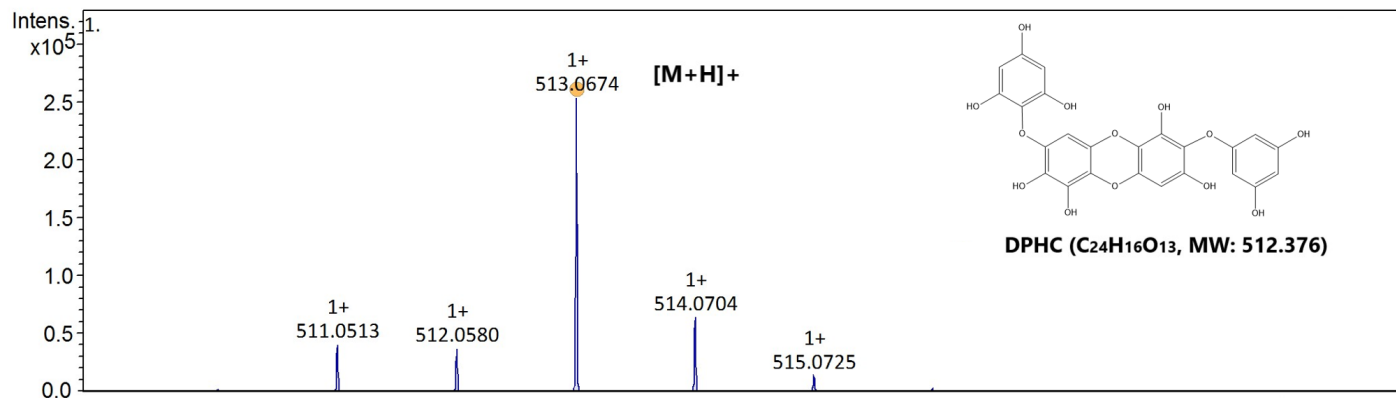

**Figure S1.** Mass data and chemical structure (Inner panel) of DPHC isolated from *Ishige okamurae*.

Supplementary Materials

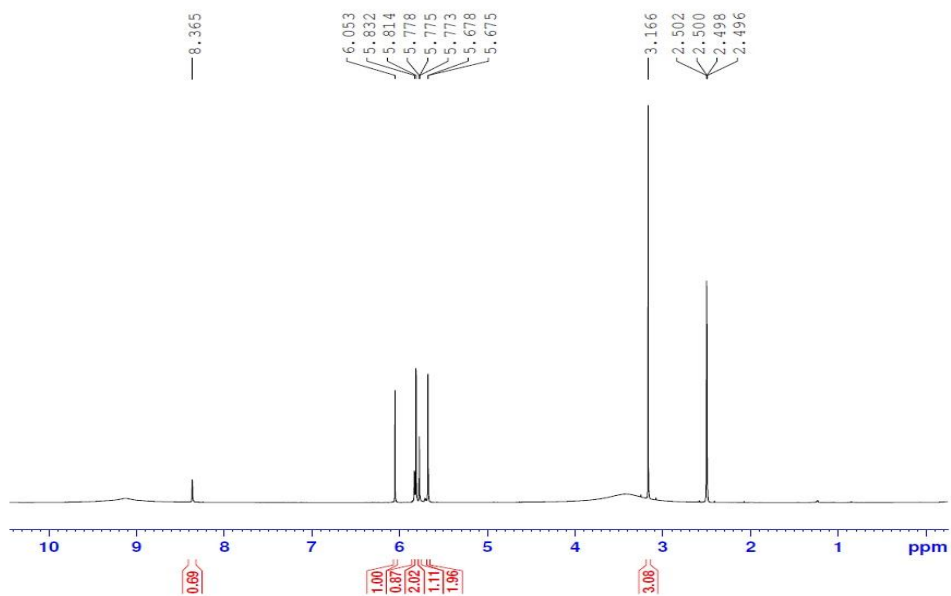

(a)

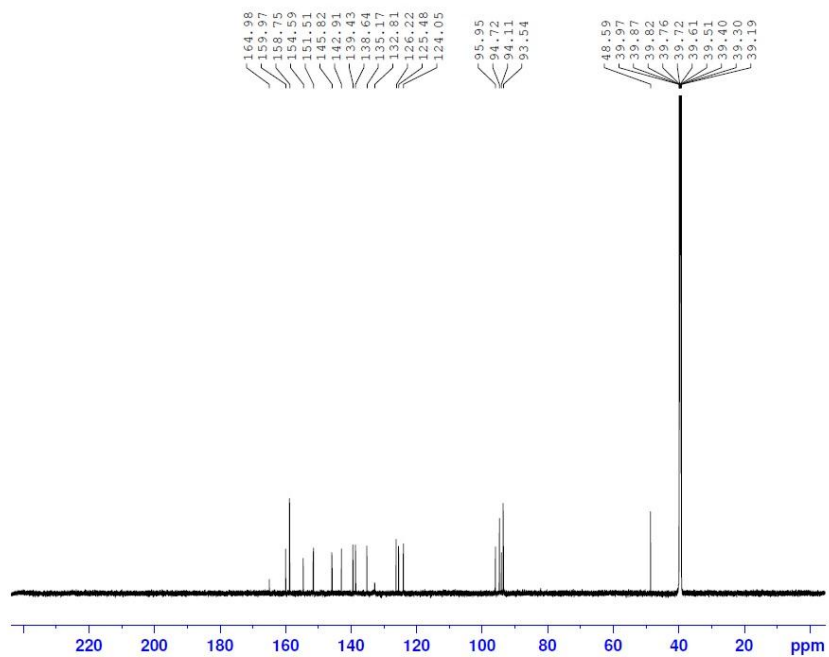

(b)

Figure S2. <sup>1</sup>H (a) and <sup>13</sup>C (b) nuclear magnetic resonance (NMR) spectra of DPHC isolated from *Ishige okamurae*.
